# Supplementary material for: Electron-interfered field-effect transistors as a sensing platform for detecting a delicate surface chemical reaction
Source: Royal Society of Chemistry journal article supplement (doi:10.1039/d1tc01073e), 2021-01-01
Supplement: d1tc01073e1.pdf [file d1tc01073e1.pdf]

# Supplementary Information

for

## Electron-Interfered Field-Effect Transistors as Sensor Platform for Detecting a Delicate Surface Chemical Reaction

*Giheon Choi*<sup>†1</sup>, *Kanghuck Lee*<sup>2†</sup>, *Seungtaek Oh*<sup>1</sup>, *Jungyoon Seo*<sup>1</sup>, *Eunyoung Park*<sup>1</sup>, *Yeong Don Park*<sup>\*4</sup>, *Jihoon Lee*<sup>\*2,3</sup>,  
*Hwa Sung Lee*<sup>\*1</sup>

<sup>1</sup>Department of Materials Science and Chemical Engineering, Hanyang University, Ansan 15588, Republic of Korea.

<sup>2</sup>Department of IT Convergence, Korea National University of Transportation, Chungju 27469, Republic of Korea

<sup>3</sup>Department of Polymer Science and Engineering, Korea National University of Transportation, Chungju 27469, Republic of Korea

<sup>4</sup>Department of Energy and Chemical Engineering, Incheon National University, Incheon 22012, Republic of Korea

<sup>†</sup>G. Choi and K. Lee contributed equally to this work.

<sup>\*</sup>Corresponding author. E-mail: [ydpark@inu.ac.kr](mailto:ydpark@inu.ac.kr) (Y. D. Park), [jihoonli@ut.ac.kr](mailto:jihoonli@ut.ac.kr) (J. Lee), [hslee78@hanyang.ac.kr](mailto:hslee78@hanyang.ac.kr) (H. S. Lee)

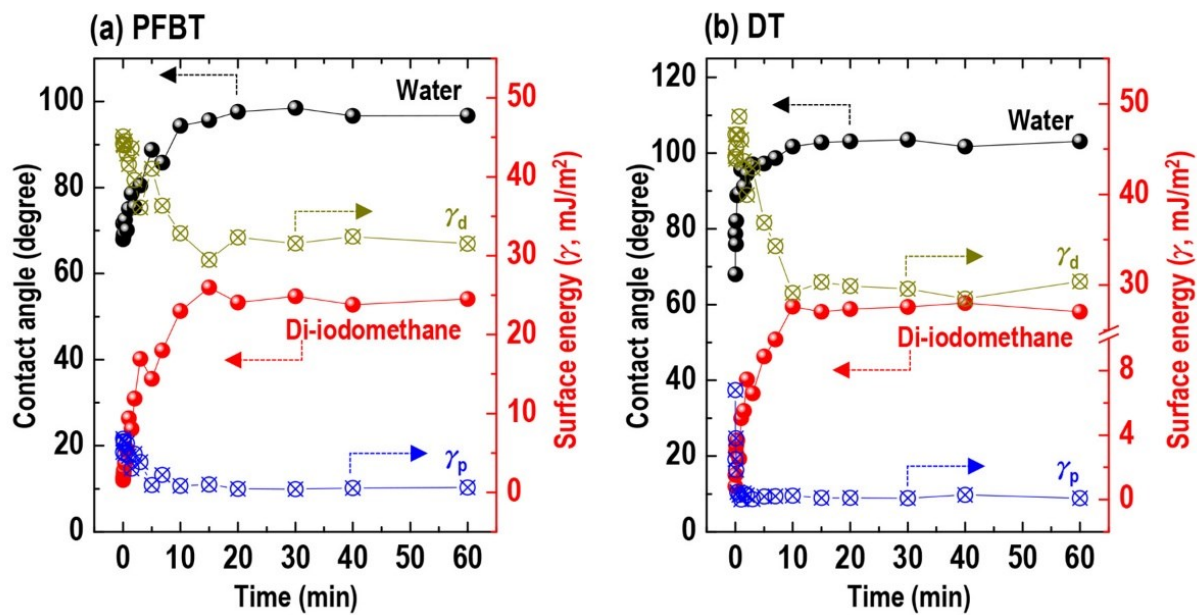

**Figure S1.** Variations in the contact angles using D.I. water and diiodomethane or the dispersive ( $\gamma_d$ ) and polar ( $\gamma_p$ ) surface energies of IE surface according to the reaction time. (a) PFBT and (b) DT cases.
